# Supplementary material
Source: publisher site journal article supplement (https://kjim.org/upload/media/kjim-2024-339-Supplementary-Table-3.pdf)
Supplement: Supplementary file 1 [file kjim-2024-339-Supplementary-Table-3.pdf]

**Supplementary Table 3. Random forest classifier analysis of serum samples by groups**

| Act. group                  | Pred. group (train set) |    |    |    | Correctly classified | Pred. group (test set) |    |    |    | Correctly classified |
|-----------------------------|-------------------------|----|----|----|----------------------|------------------------|----|----|----|----------------------|
|                             | Control                 | LG | HG | GC |                      | Control                | LG | HG | GC |                      |
| Control                     | 72                      | 0  | 0  | 0  | 100.0%               | 28                     | 0  | 0  | 0  | 100.0%               |
| LG                          | 6                       | 45 | 9  | 9  | 65.2%                | 3                      | 23 | 1  | 4  | 74.2%                |
| HG                          | 7                       | 7  | 50 | 5  | 72.5%                | 0                      | 0  | 28 | 3  | 90.3%                |
| GC                          | 9                       | 4  | 4  | 53 | 75.7%                | 4                      | 0  | 0  | 26 | 86.7%                |
| Overall correct class. Rate |                         |    |    |    | 78.6%                | 87.5%                  |    |    |    |                      |

The random forest classifier was performed using *Pseudomonas yamanorum*, *Cutibacterium acnes*, *Ralstonia insidiosa*, and *Pseudomonas antarctica*, identified as group-discriminative by MaAsLin2 analysis of serum samples. To address sample imbalance, SMOTE was applied, generating a balanced dataset of 100 samples.

Pred., predicted group; Act., actual group; LG, low-grade dysplasia; HG, high-grade dysplasia; GC, gastric cancer.
